# Supplementary material
Source: PubMed Central journal article supplement (PMC3121332)
Supplement: NIHMS297869-supplement-Table.pdf [file NIHMS297869-supplement-Table.pdf]

*Table 1 Equations describing the relationship between protein content and time in growing, quiescent and restimulated cultures*

| <i>Sample</i>            | <i>Model</i> | <i>Equation</i>         | <i>R2 value</i> | <i>Integral from 0 to 96 hours</i> |
|--------------------------|--------------|-------------------------|-----------------|------------------------------------|
| Growing, no serum        | Exponential  | $y = 26.6e^{0.0201x}$   | 0.946           | 7899                               |
| Growing, 0.1% serum      | Exponential  | $y = 26.5e^{0.0238x}$   | 0.974           | 9817                               |
| Quiescent, no serum      | Linear       | $y = -0.6359x + 561.36$ |                 | 50960                              |
| Quiescent, 0.1% serum    | Linear       | $y = -0.2077x + 555.61$ |                 | 52381                              |
| Restimulated, no serum   | Exponential  | $y = 55e^{0.0139x}$     | 0.955           | 8486                               |
| Restimulated, 0.1% serum | Exponential  | $y = 68.7e^{0.0134x}$   | 0.923           | 10018                              |
